# Supplementary material
Source: ML conference proceedings conference paper supplement (https://proceedings.neurips.cc/paper_files/paper/2007/hash/3435c378bb76d4357324dd7e69f3cd18-Abstract.html)
Supplement: Supplementary file 2 [file 3435c378bb76d4357324dd7e69f3cd18-Supplemental.zip]

# Competition adds Complexity

by Judy Goldsmith (U. of Kentucky) and Martin Mundhenk (U. Jena)

NIPS spotlight ID M4

Whether you gamble or work:

if you team up, you don't know what your teammate does.

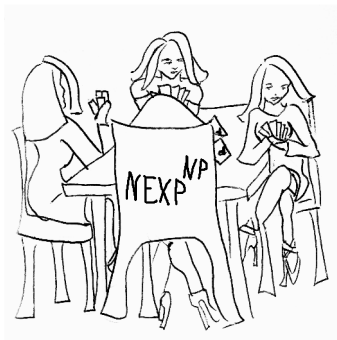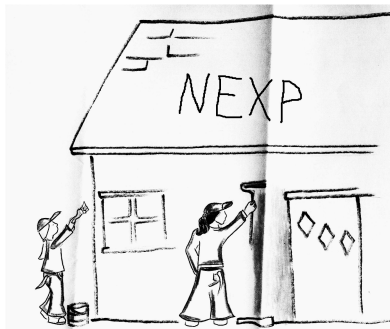

Either way:

playing a game 2-against-2 is harder than working together!

We use partially observable stochastic games for our analysis.
