# Supplementary material
Source: ML conference proceedings conference paper supplement (https://proceedings.neurips.cc/paper_files/paper/2007/hash/3435c378bb76d4357324dd7e69f3cd18-Abstract.html)
Supplement: Supplementary file 3 [file 3435c378bb76d4357324dd7e69f3cd18-Supplemental.zip]

Archive with 3 entries (3 files):
- Paper599.pdf
- spotlight.mp3
- spotlight.pdf
